# Supplementary material for: Electrocatalytic activity for the oxygen reduction reaction of oxygen-containing nanocarbon synthesized by solution plasma
Source: Royal Society of Chemistry journal article supplement (doi:10.1039/c4ta01577k), 2014-01-01
Supplement: c4ta01577k1.pdf [file c4ta01577k1.pdf]

## Supplementary Information

### **Electrocatalytic activity for oxygen reduction reaction of metal-free oxygen-containing nanocarbon synthesized by solution plasma**

Takahiro Ishizaki,<sup>a,b,\*</sup> Satoshi Chiba,<sup>a</sup> Youta Kaneko,<sup>a</sup> and Gasidit Panomsuwan<sup>a</sup>

<sup>a</sup> Department of Material Science and Engineering, Faculty of Engineering, Shibaura Institute of Technology, 3-7-5 Toyosu, Koto-ku, Tokyo 135-8548, Japan

<sup>b</sup> JST-CREST, 4-1-8 Honcho, Kawaguchi, Saitama 332-0012, Japan

\*Corresponding author. Tel: +81-3-5859-8115, Fax: +81-3-5859-8115

E-mail: [ishizaki@shibaura-it.ac.jp](mailto:ishizaki@shibaura-it.ac.jp)

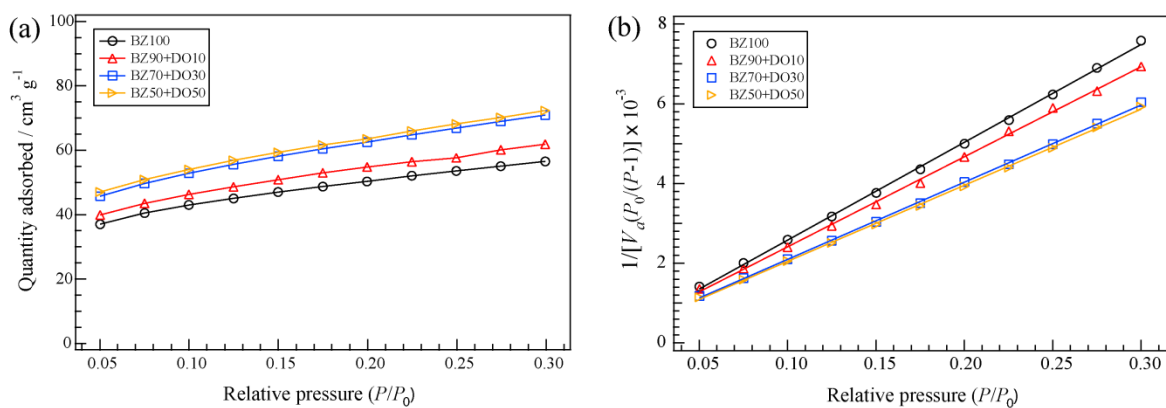

**Figure S11.** (a)  $N_2$  adsorption isotherm plot and (b) multi-point BET surface area plot for all carbon samples.

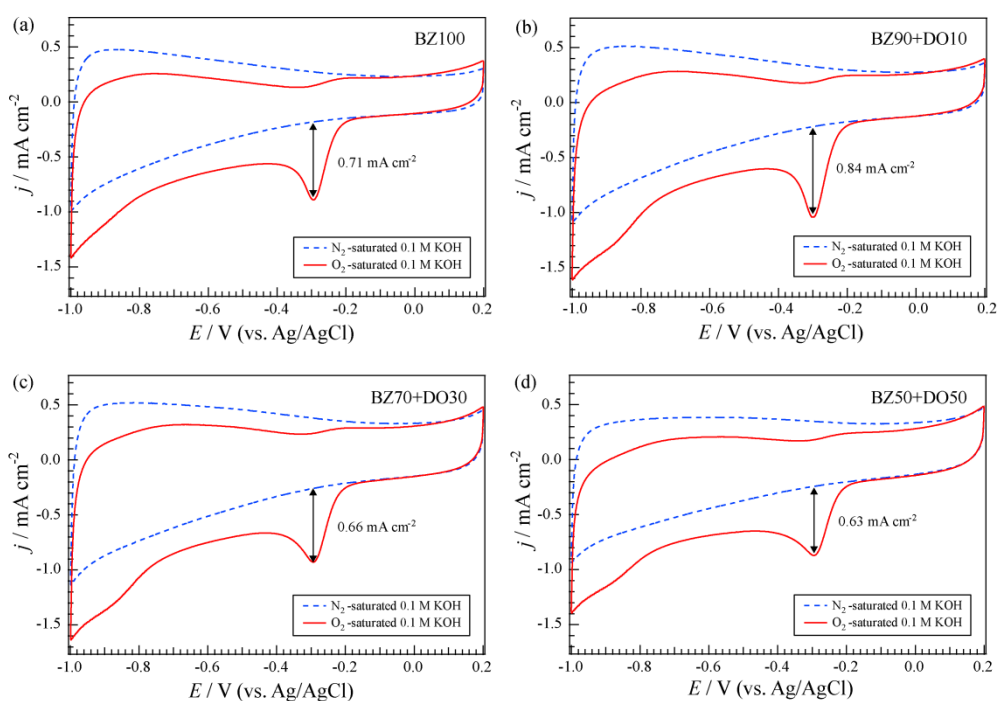

**Figure S12.** Cyclic voltammograms of the nanocarbon samples synthesized from (a) BZ100, (b) BZ90+DO10, (c) BZ70+DO30, and (d) BZ50+DO50 in a 0.1 M KOH solution saturated with  $N_2$  (dashed line) and  $O_2$  (solid line).

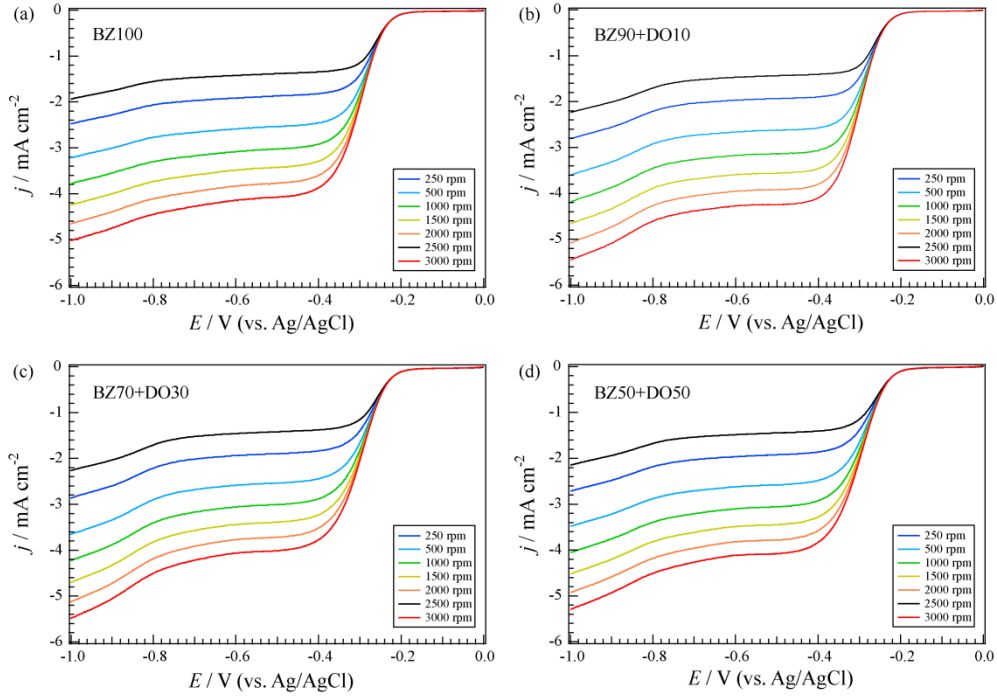

**Figure S13.** LSV curves of the nanocarbon samples synthesized from (a) BZ100, (b) BZ90+DO10, (c) BZ70+DO30, and (d) BZ50+DO50. The measurement was performed at different rotation speeds (250–3000 rpm) in an O<sub>2</sub> saturated 0.1 M KOH solution with a scan rate of 10 mV s<sup>-1</sup>.

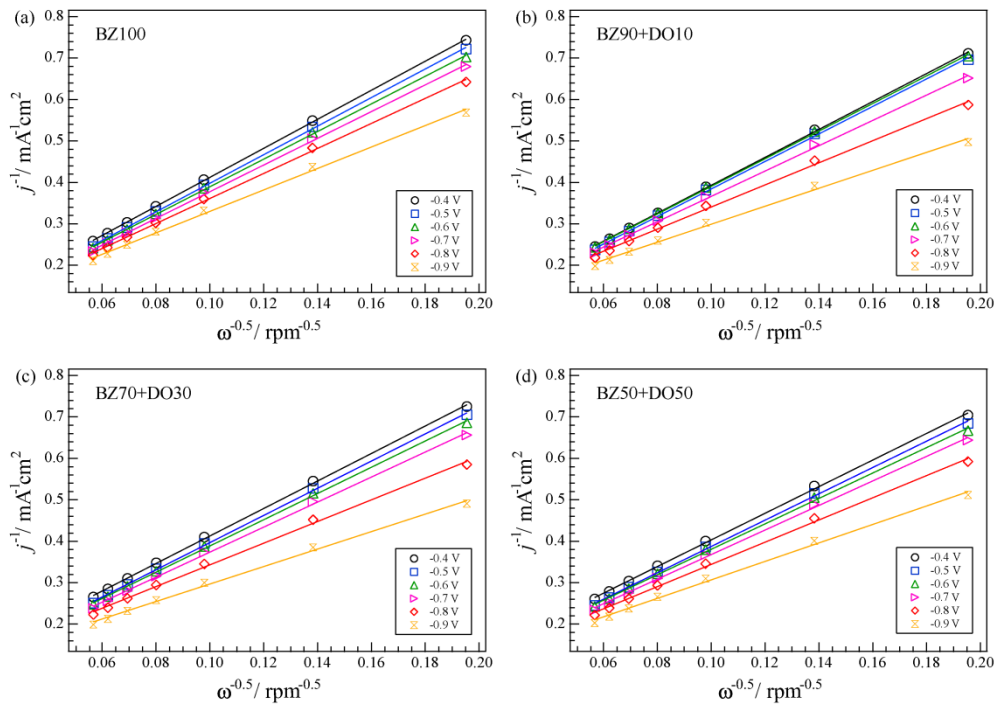

**Figure S14.** K-L plots at different potentials of the nanocarbon samples synthesized from (a) BZ100, (b) BZ90+DO10, (c) BZ70+DO30, and (d) BZ50+DO50.

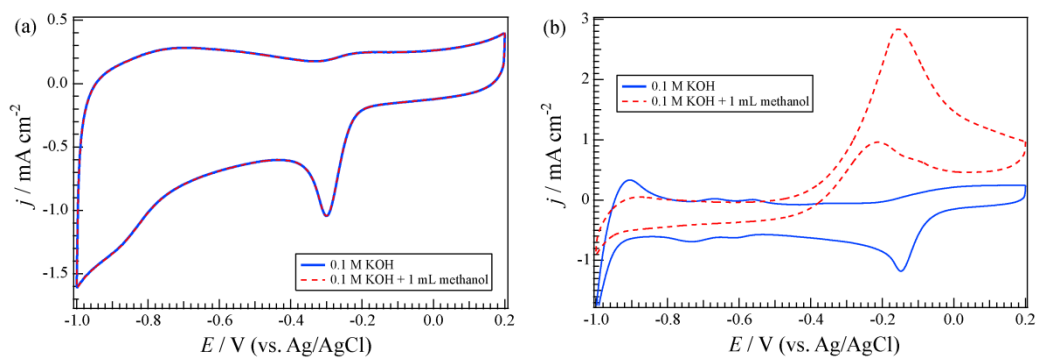

**Figure S15.** Comparative CV curves before (solid line) and after addition of 1 mL methanol (dashed line) of (a) nanocarbon synthesized from BZ90+DO10 and (b) 20 wt% Pt/carbon.
